# Supplementary material
Source: PubMed Central journal article supplement (PMC5728989)

A.

◆ Medical Use Only, Males    ■ Medical Use Only, Females    ▲ Medical Before Nonmedical, Males    ✕ Medical Before Nonmedical, Females

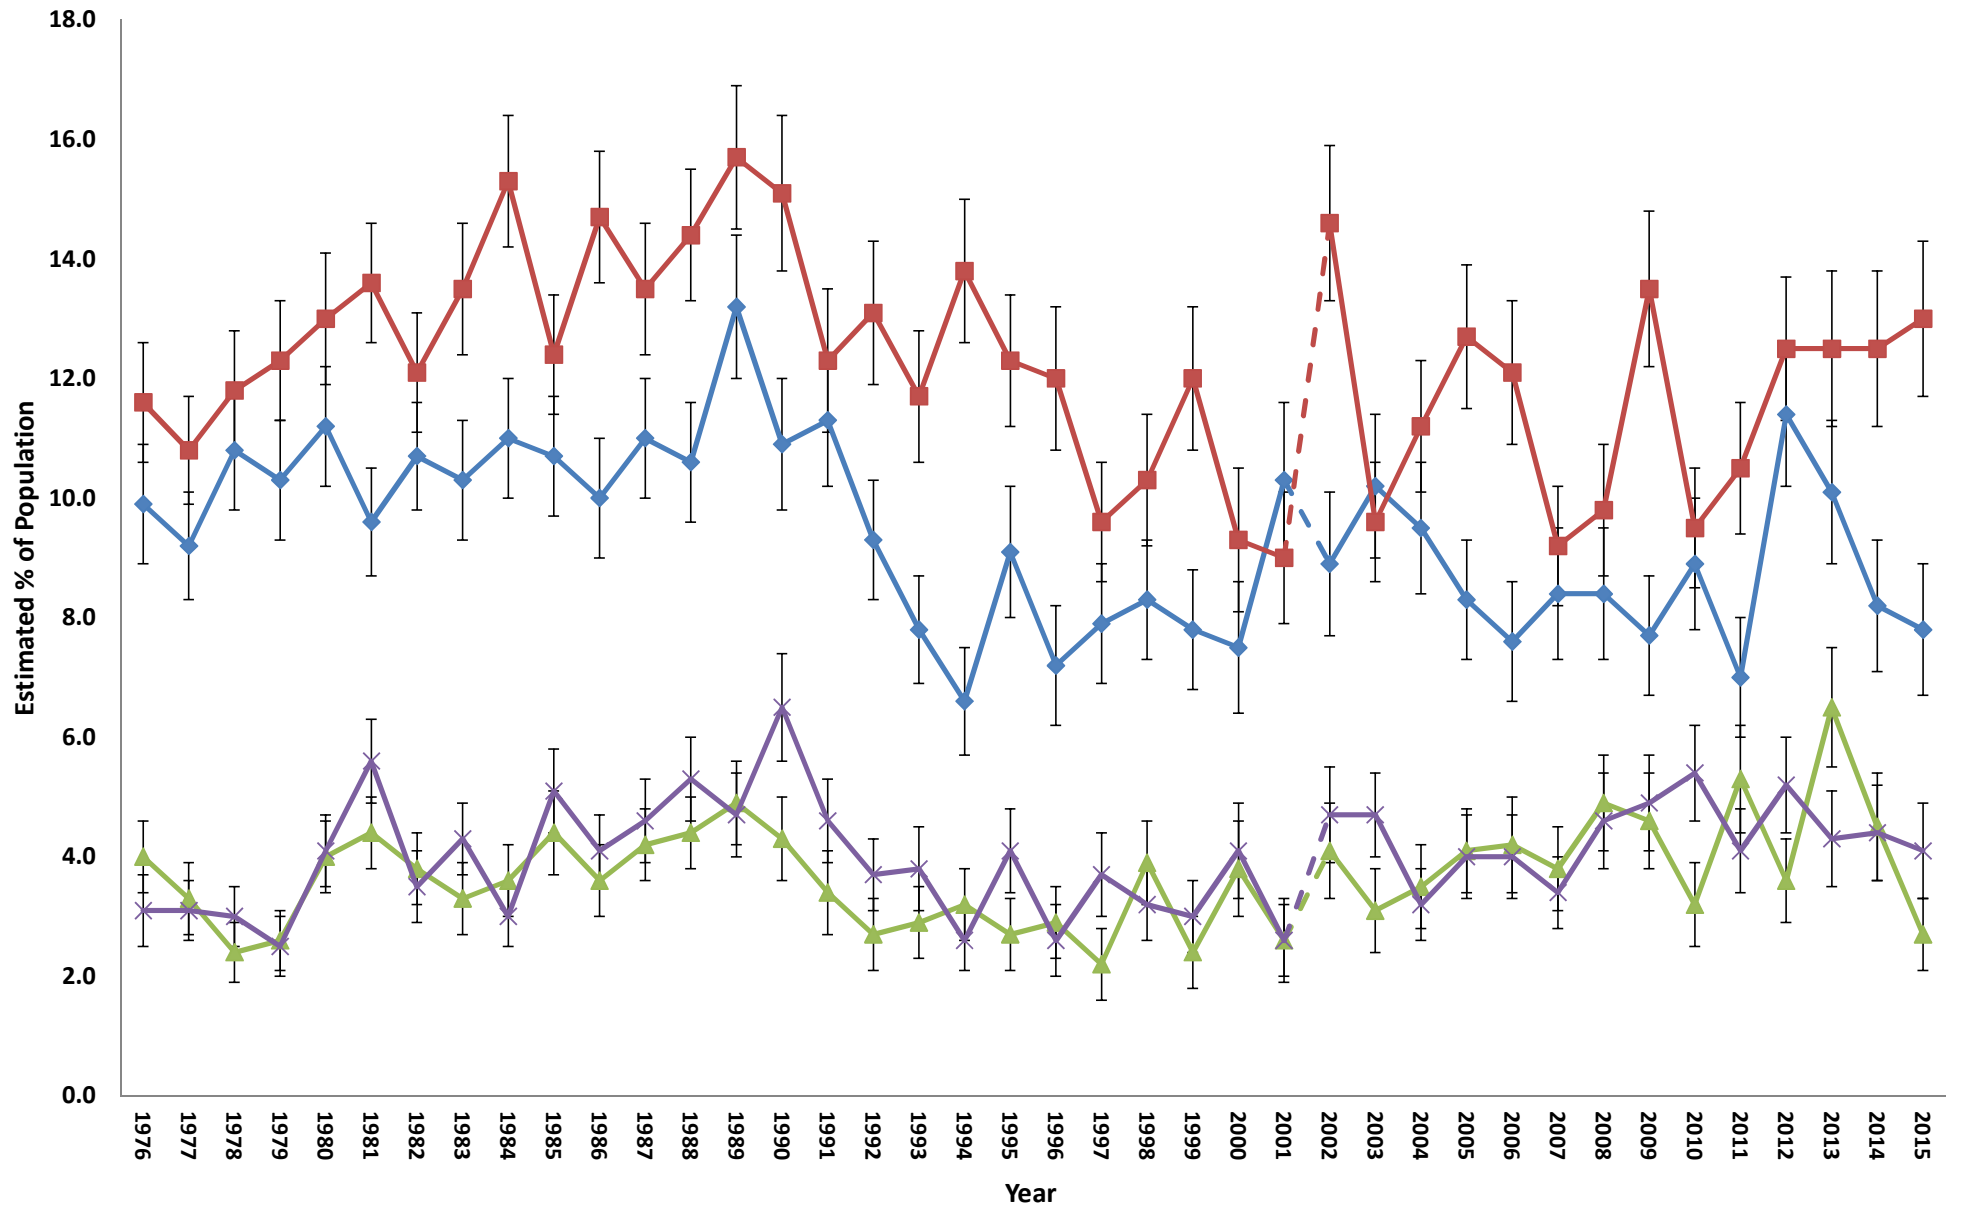

Supplement: NIHMS859295-supplement-supp_fig_5.pdf [file NIHMS859295-supplement-supp_fig_5.pdf]
