# Supplementary material
Source: PubMed Central journal article supplement (PMC5728989)

B.

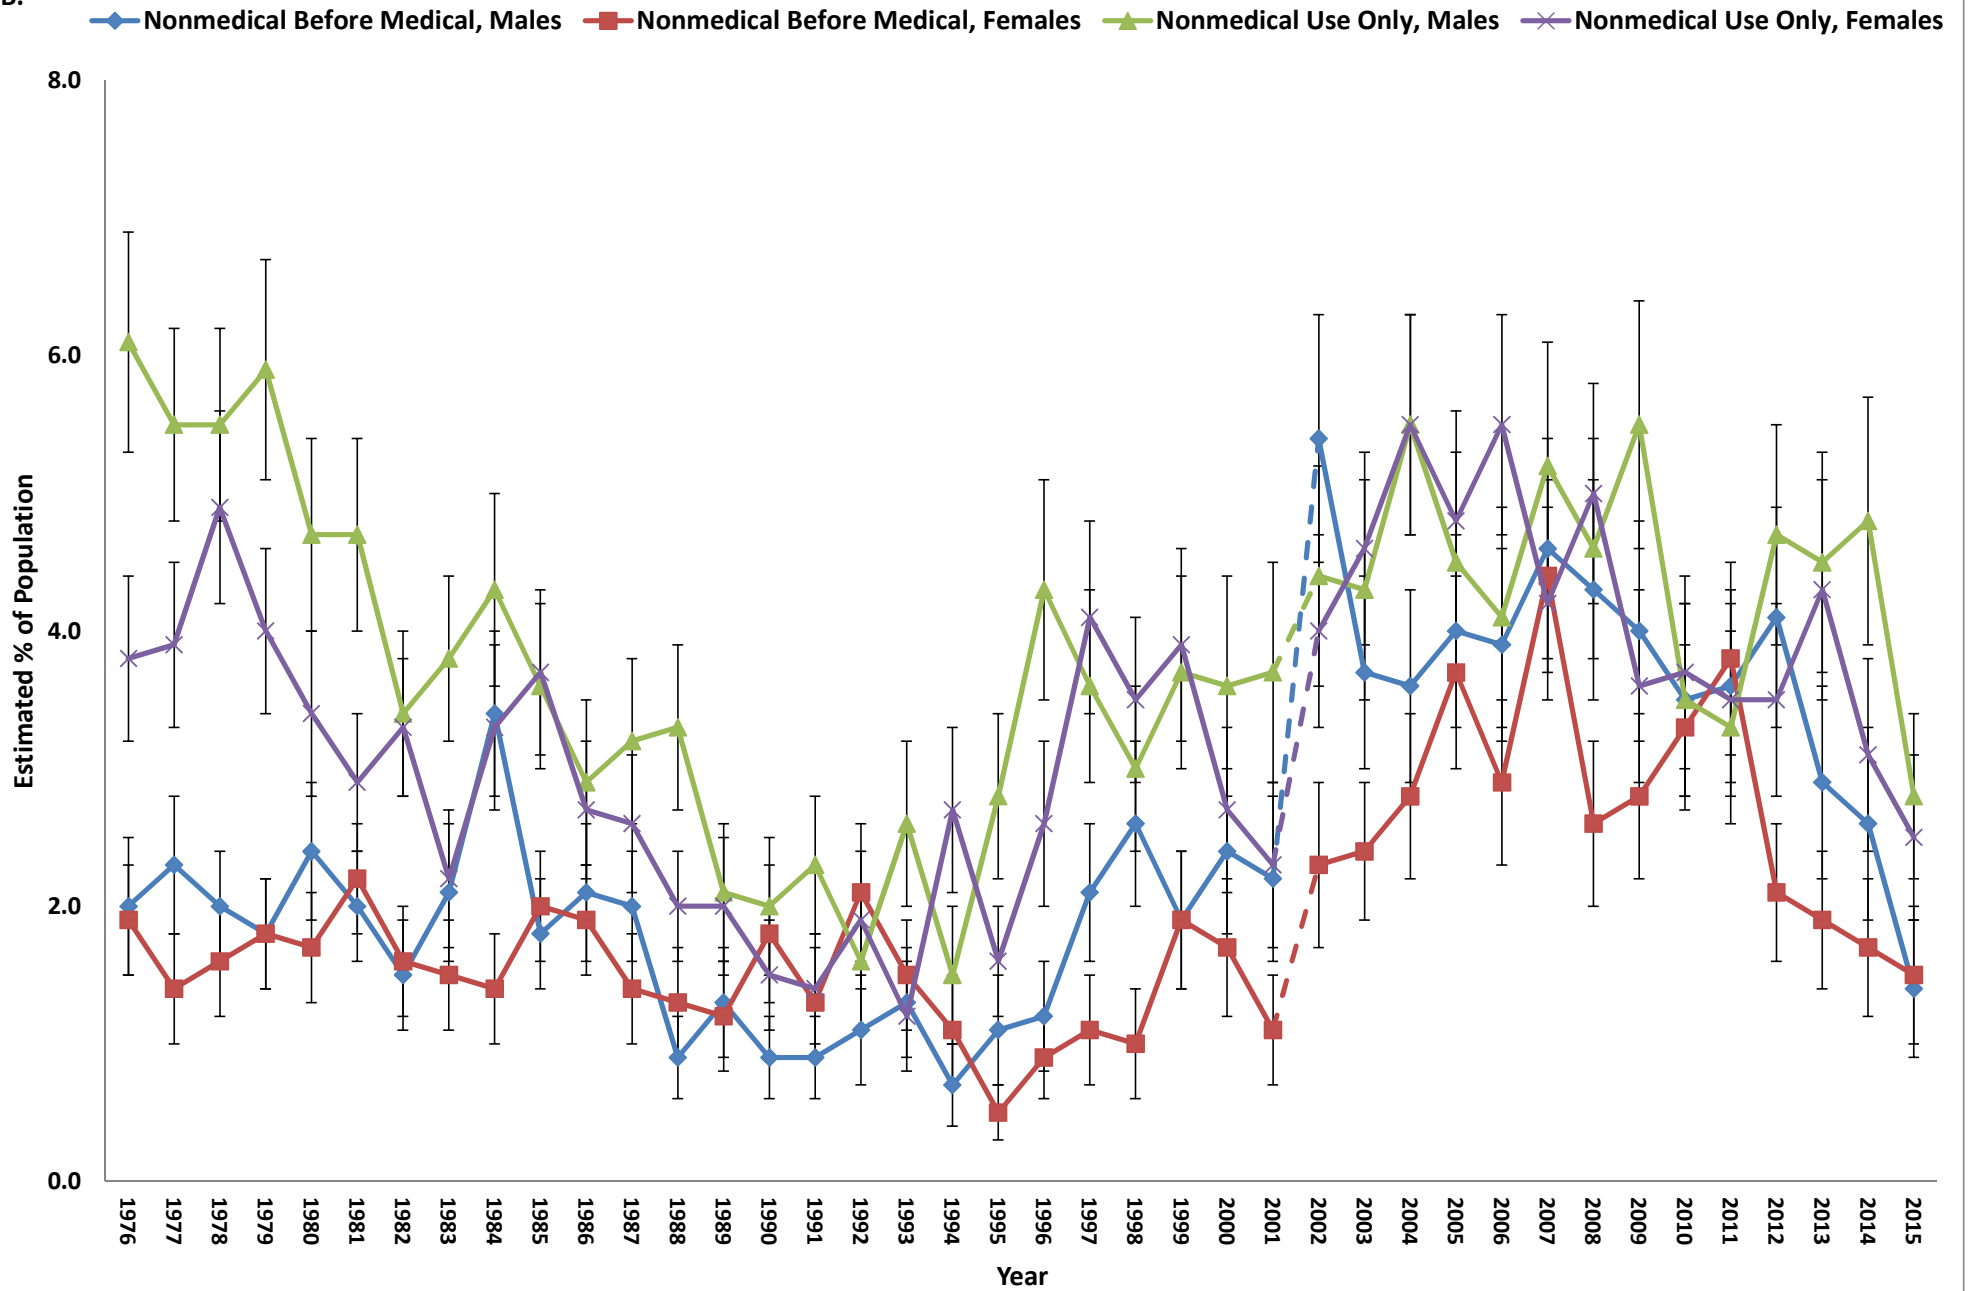

Supplement: NIHMS859295-supplement-supp_fig_6.pdf [file NIHMS859295-supplement-supp_fig_6.pdf]
